# Supplementary material
Source: Springer Nature journal article supplement (https://www.springermedizin.de/resource/supplementary/13058_2011_2883_MOESM1_ESM.pdf/9702766)

A.

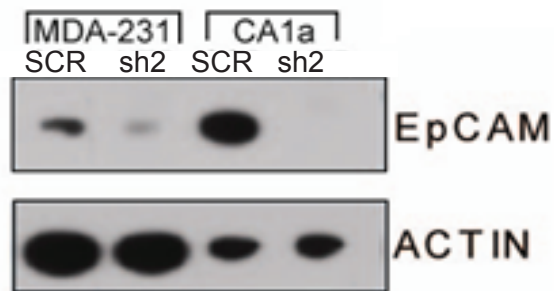

B.

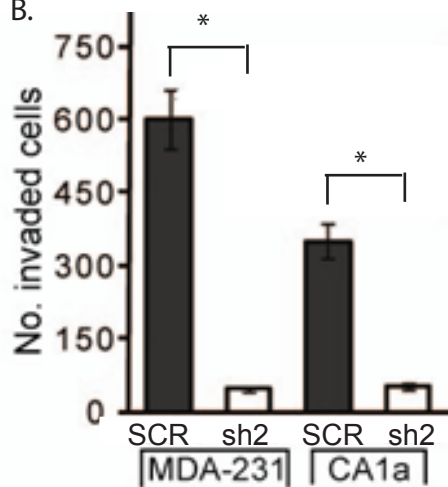

C.

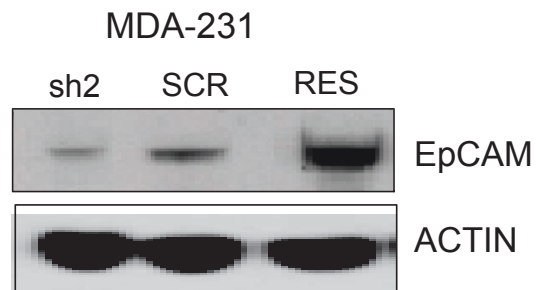

D.

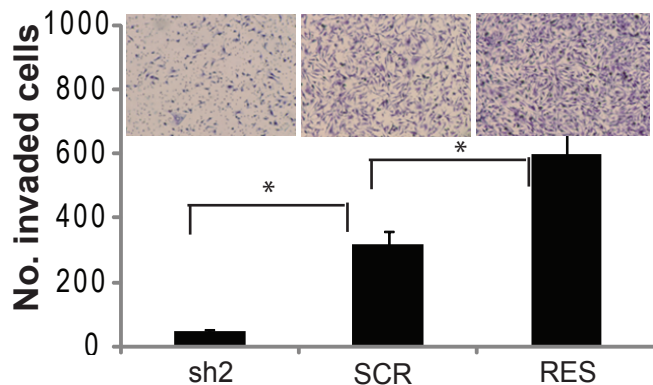

Supplement: MOESM1 [file 9702766]
